# Supplementary material for: Design and synthesis of multifaceted dicyanomethylene rhodanine linked thiophene: a SnOx–perovskite dual interface modifier facilitating enhanced device performance through improved Fermi level alignment, defect passivation and reduced energy loss
Source: Royal Society of Chemistry journal article supplement (doi:10.1039/d2se01633h), 2022-12-19
Supplement: d2se01633h1.pdf [file d2se01633h1.pdf]

**Supplementary information**

**Design and Synthesis of Multifaceted Rhodanine Linked  
Thiophene as SnO<sub>x</sub>-Perovskite Dual Interface Modifier  
Facilitating Enhanced Device Performance Through Improved  
Fermi Level Alignment, Defect Passivation and Reduced  
Energy Loss**

*Muthukumar Venu Rajendran<sup>1+</sup>, Ananthan Alagumalai<sup>2+</sup>, Saraswathi Ganesan<sup>2</sup>,  
Vidya Sudhakaran Menon<sup>2</sup>, Rohith Kumar Raman<sup>1</sup>, Senthil A. Gurusamy  
Thangavelu<sup>2</sup>, Ananthanarayanan Krishnamoorthy<sup>2\*</sup>*

\* Corresponding author

+ Authors contributed equally to this work

<sup>1</sup>Department of Physics and Nanotechnology, SRM Institute of Science and Technology, Kattankulathur, Tamil Nadu, India. Pin Code – 603203.

<sup>2</sup>Organic and Perovskite Photovoltaics Laboratory (OPPV), Department of Chemistry, SRM Institute of Science and Technology, Kattankulathur, Tamil Nadu, India. Pin Code – 603203.

E-mail: [ananthak@srmist.edu.in](mailto:ananthak@srmist.edu.in)

## Supplementary Figures

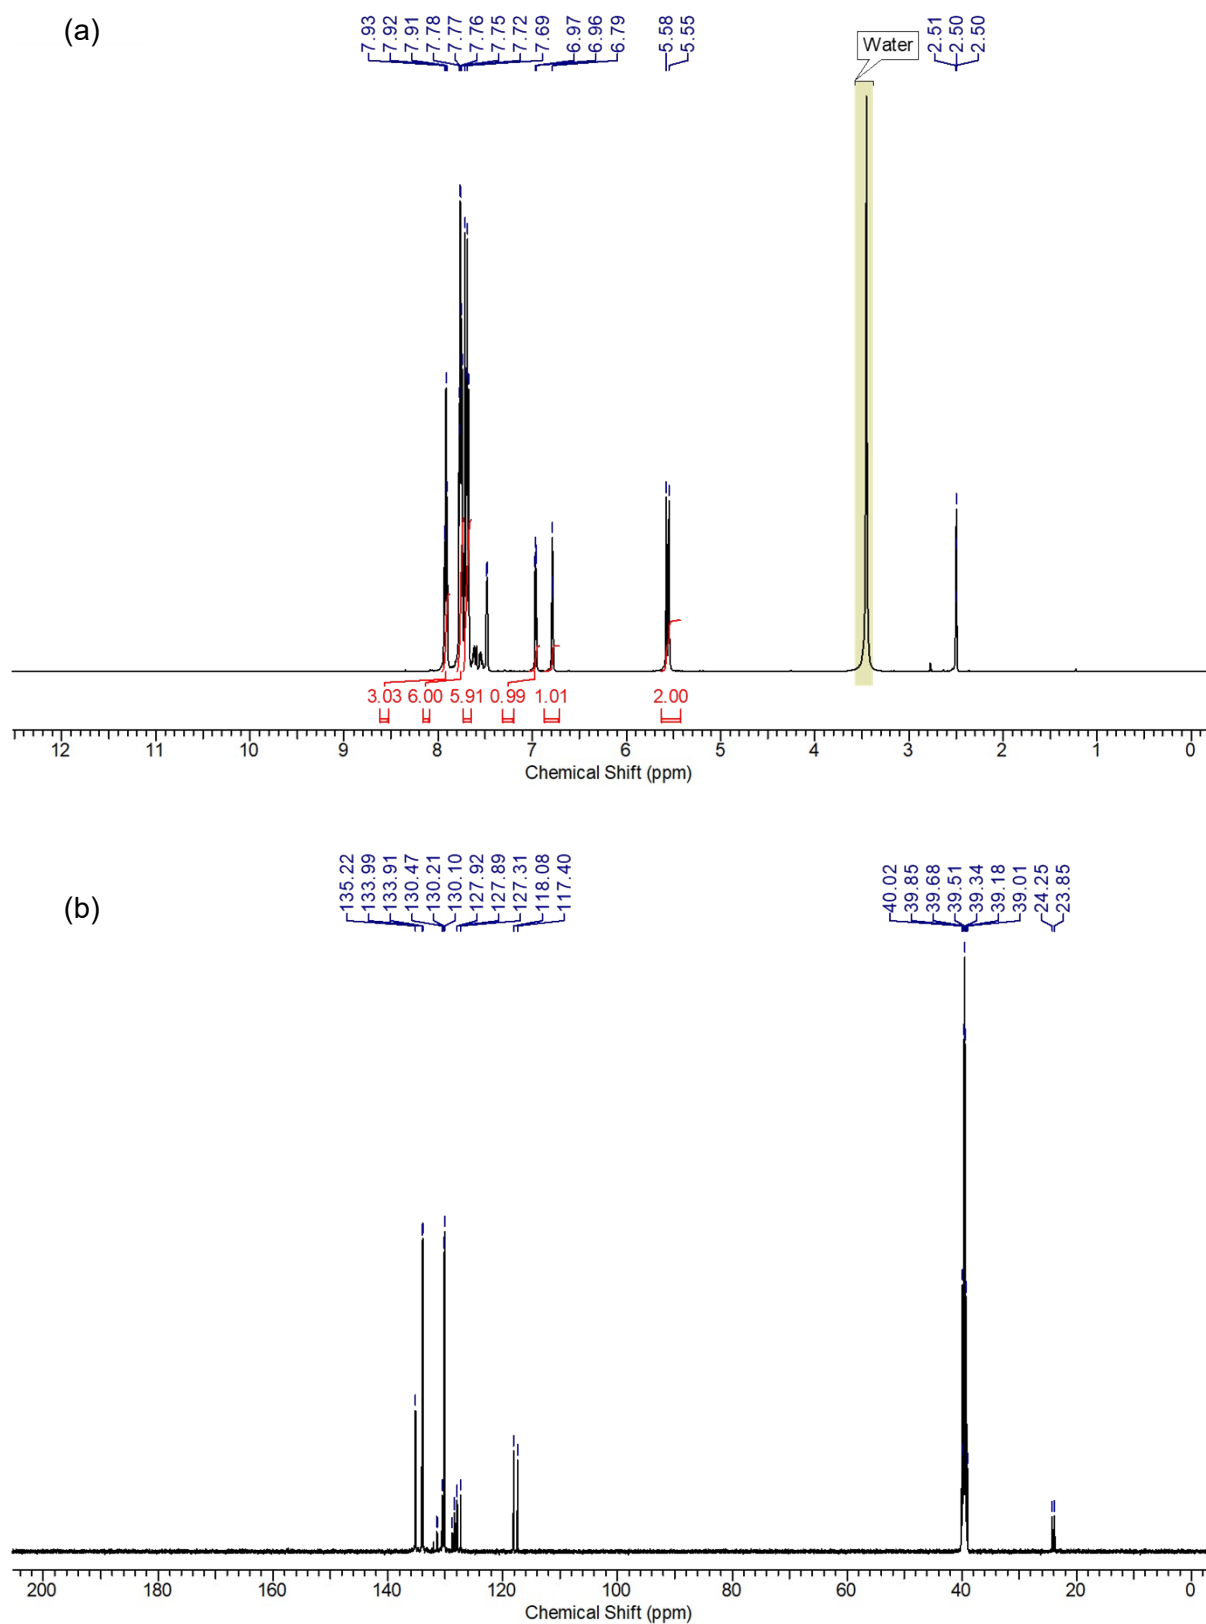

**Fig. S1** (a)  $^1\text{H}$ -NMR data of the compound **2** and (b)  $^{13}\text{C}$ -NMR data of the compound **2**.

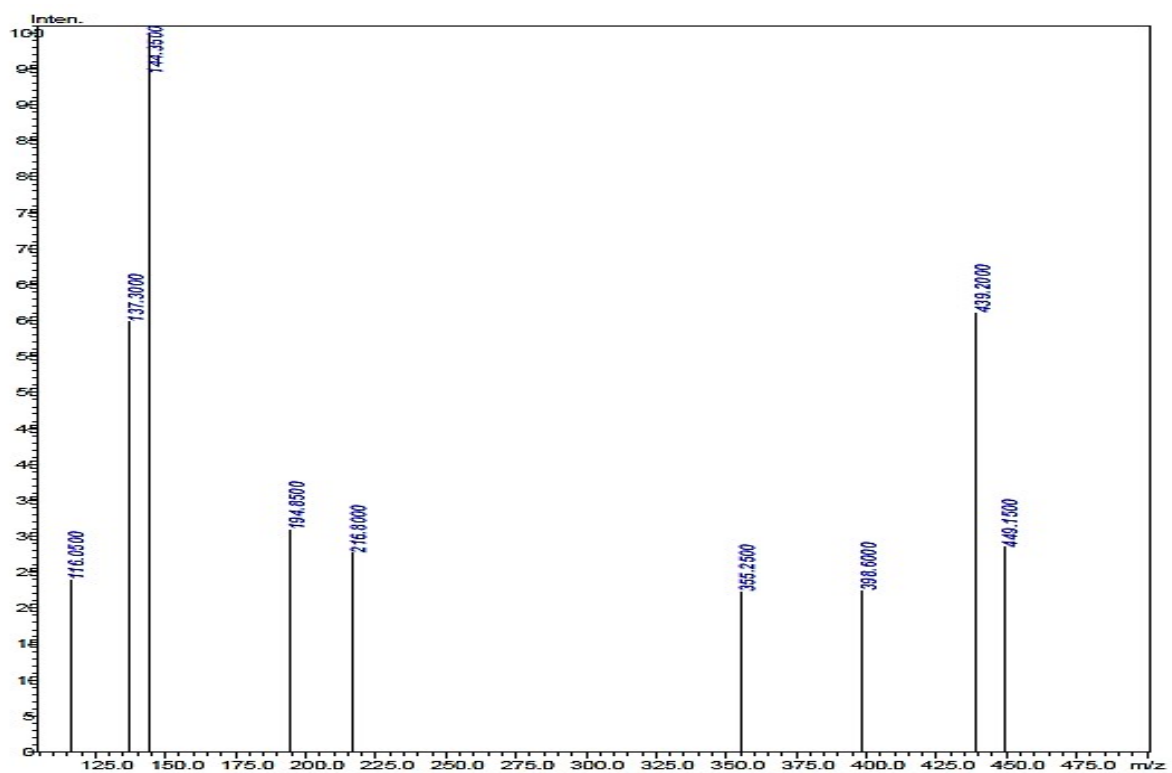

**Fig. S2** HPLC-MS data of the compound **2**.

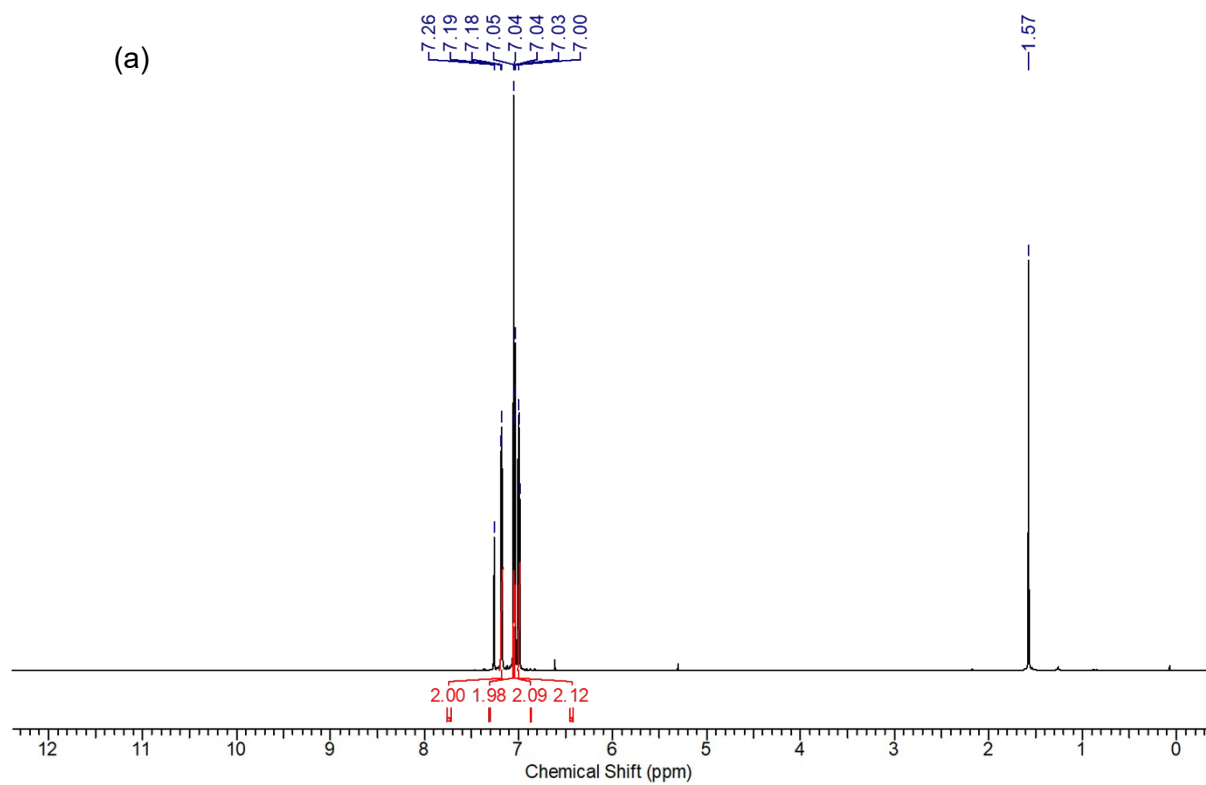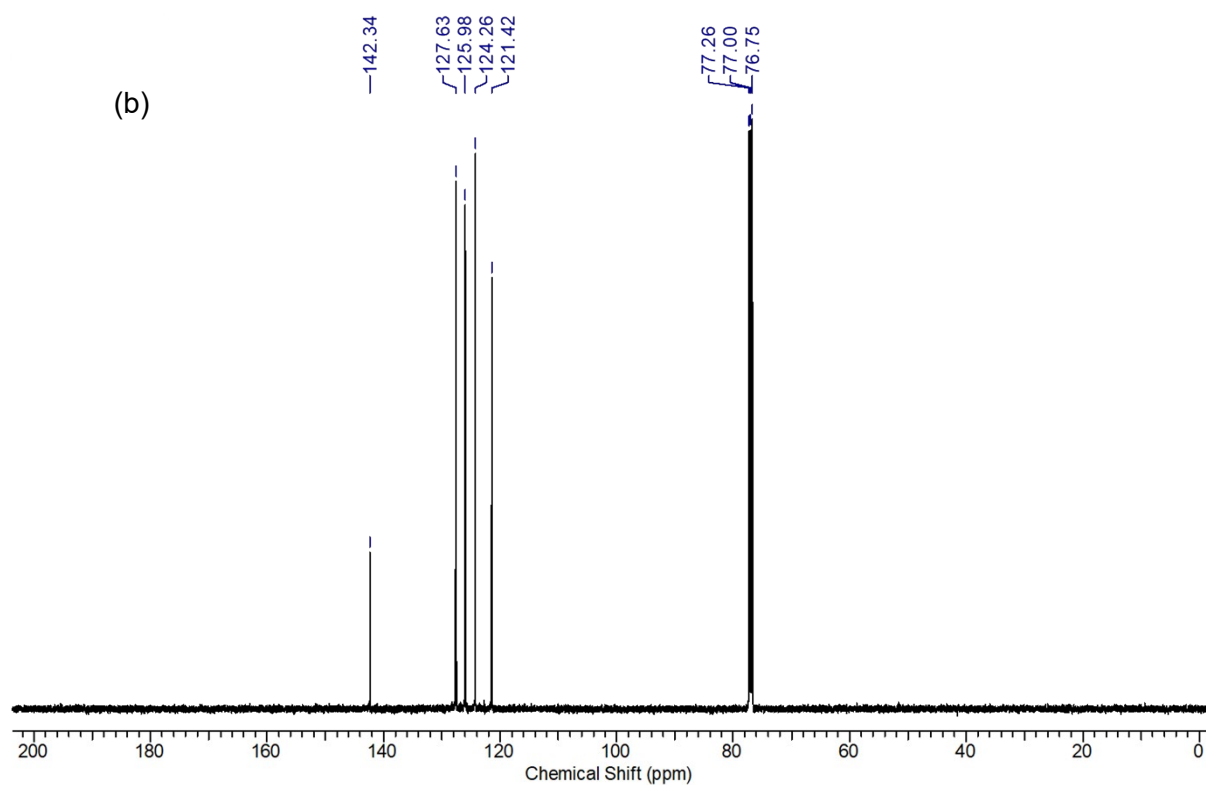

**Fig. S3** (a)  $^1\text{H}$ -NMR data of the compound **3** and (b)  $^{13}\text{C}$ -NMR data of the compound **3**.

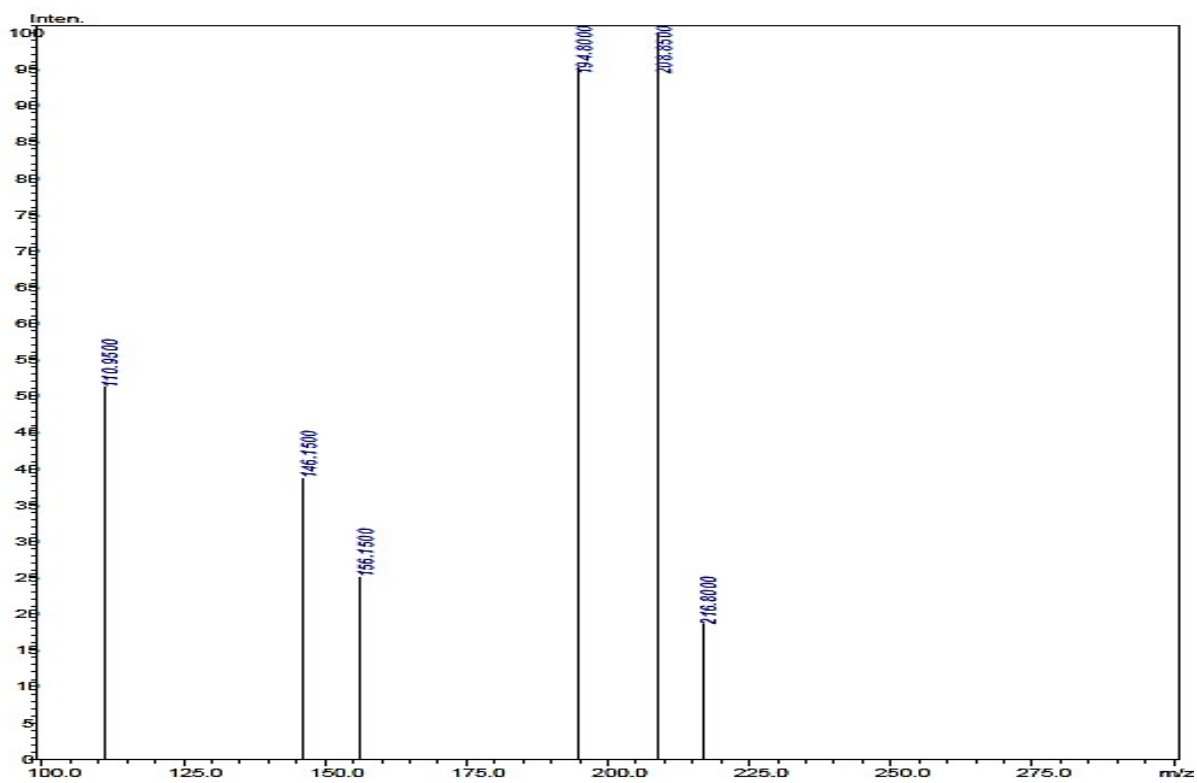

**Fig. S4** HPLC-MS data of the compound **3**.

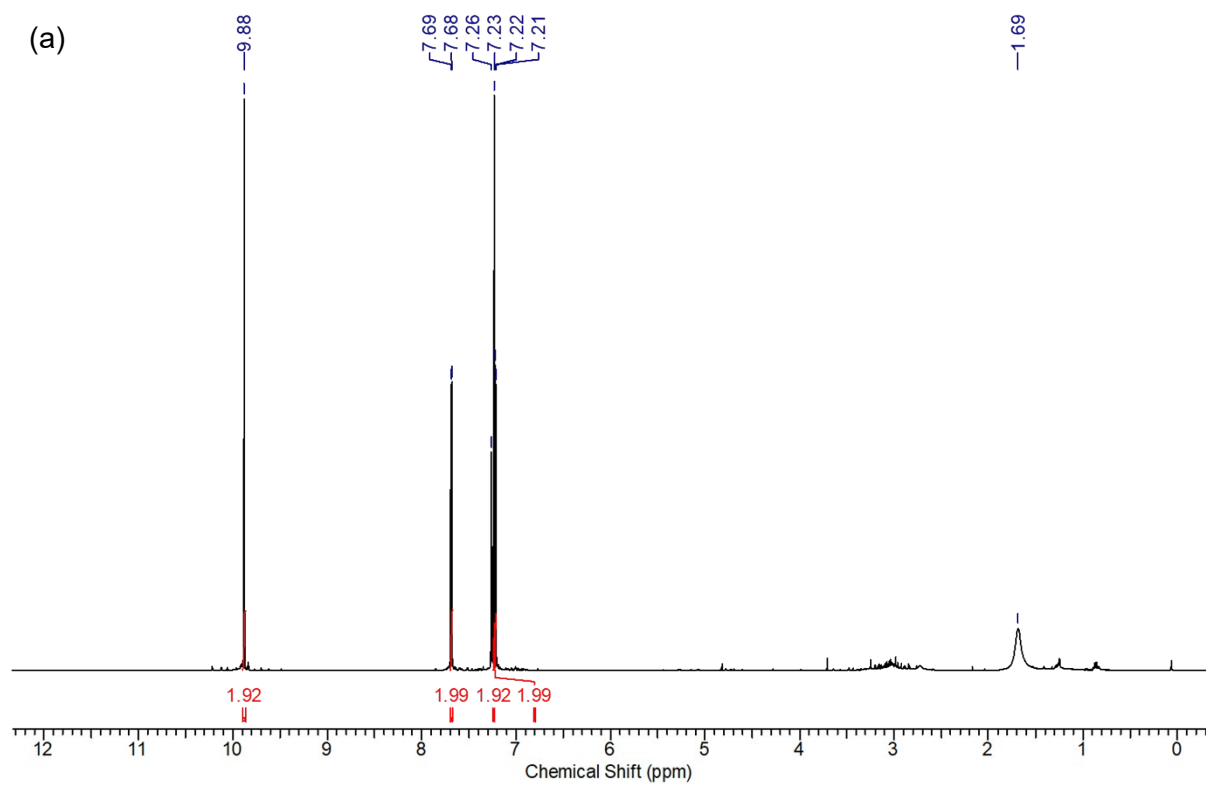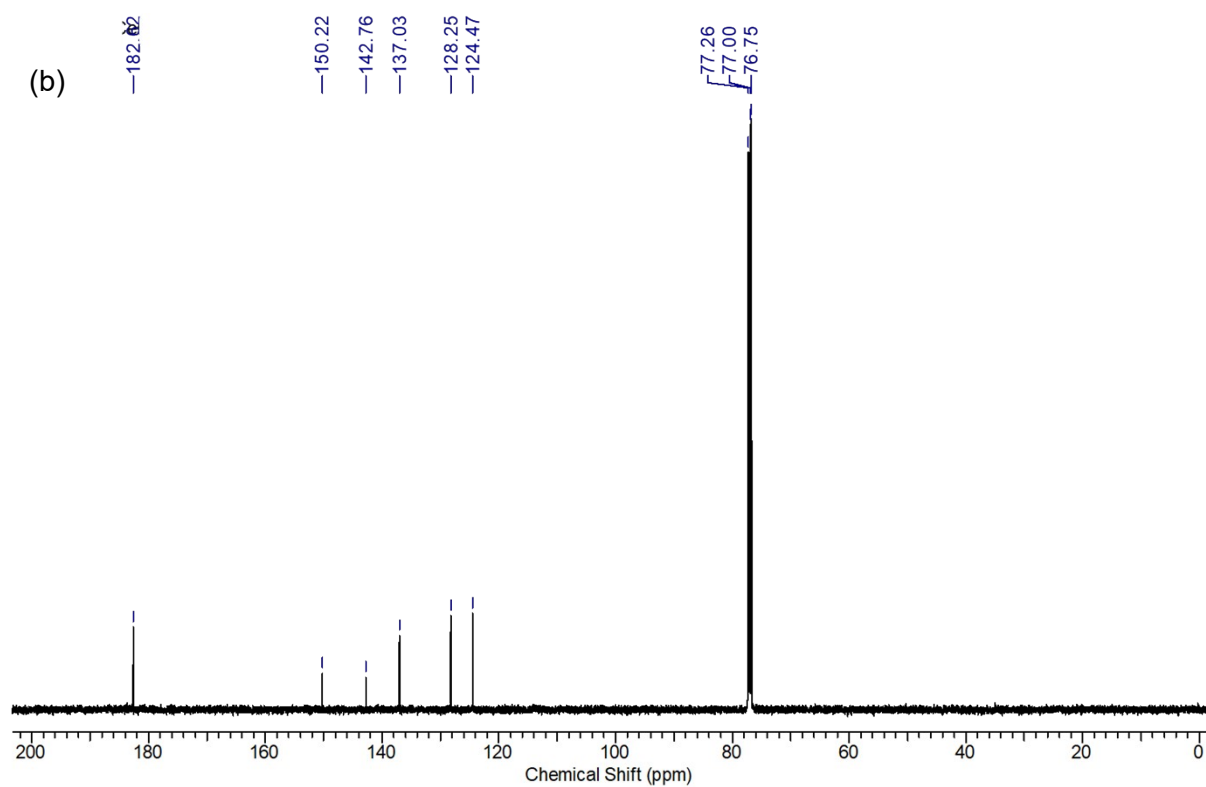

**Fig. S5** (a)  $^1\text{H}$ -NMR data of the compound **4** and (b)  $^{13}\text{C}$ -NMR data of the compound **4**.

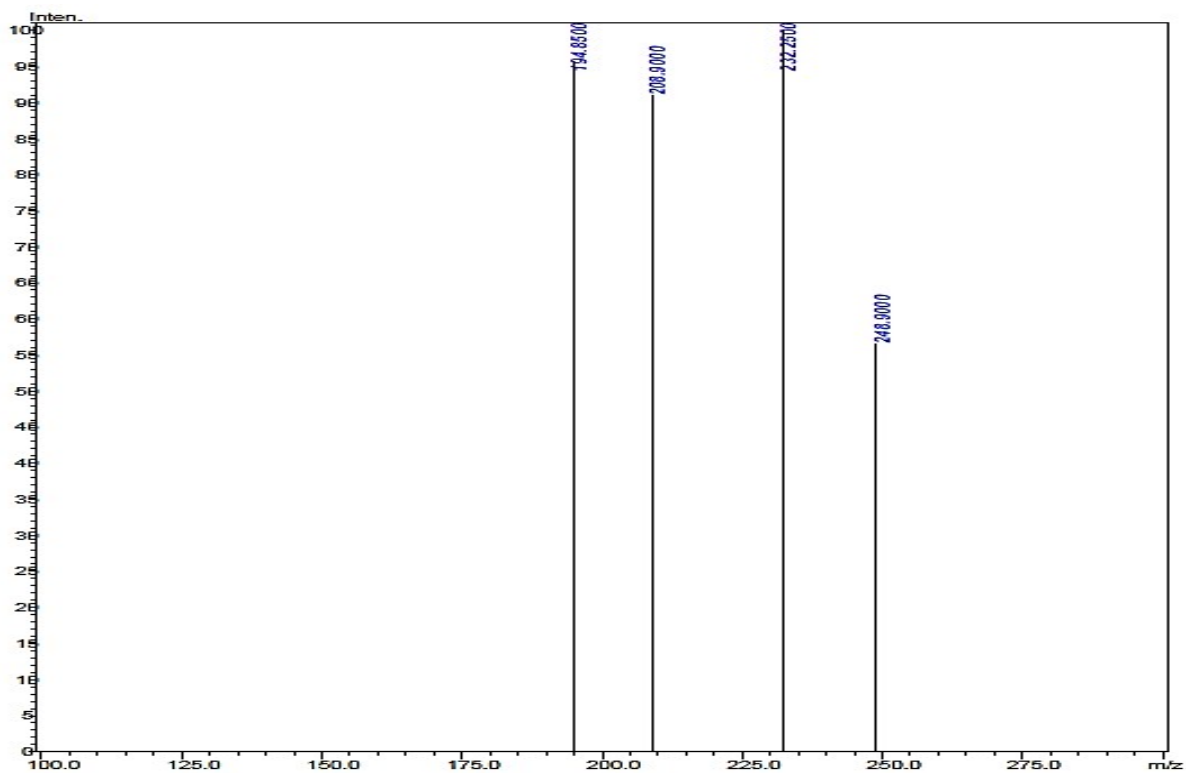

Fig. S6 HPLC-MS data of the compound **4**.

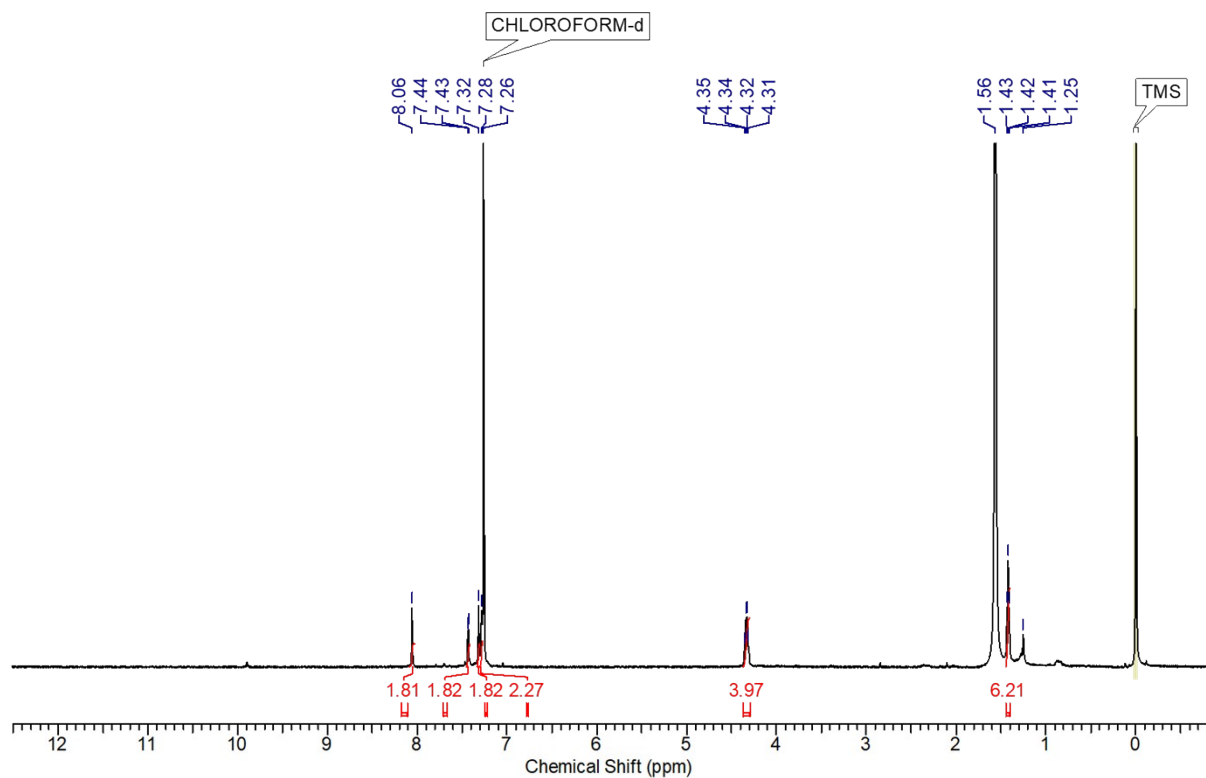

Fig. S7 <sup>1</sup>H-NMR data of the compound **AA6**.

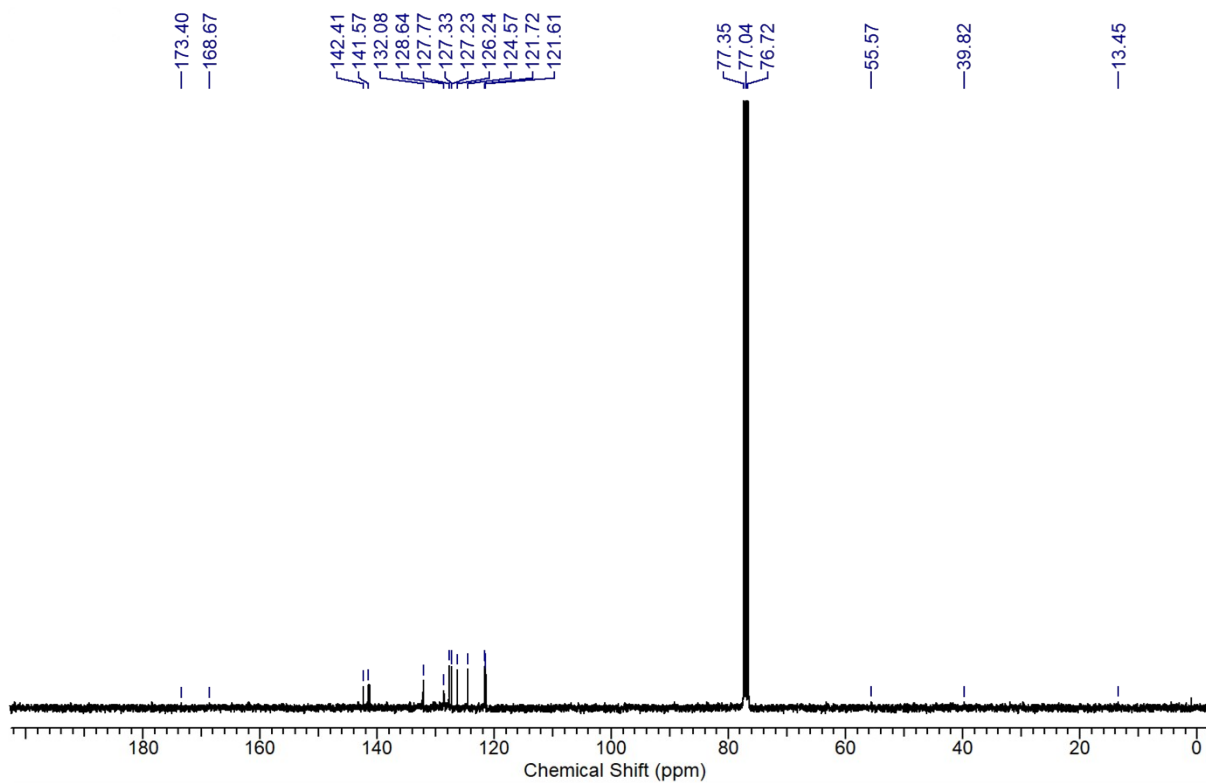

Fig. S8  $^{13}\text{C}$ -NMR data of the compound **AA6**.

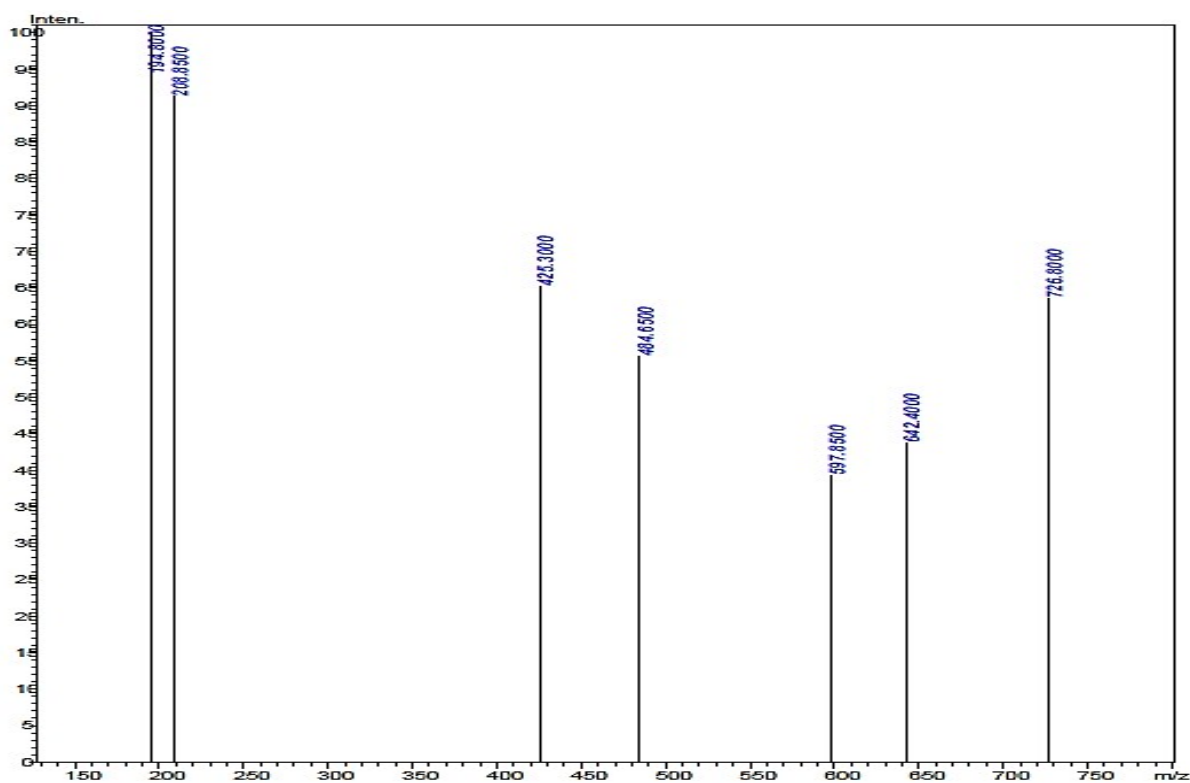

Fig. S9 HPLC-MS data of the compound **AA6**.



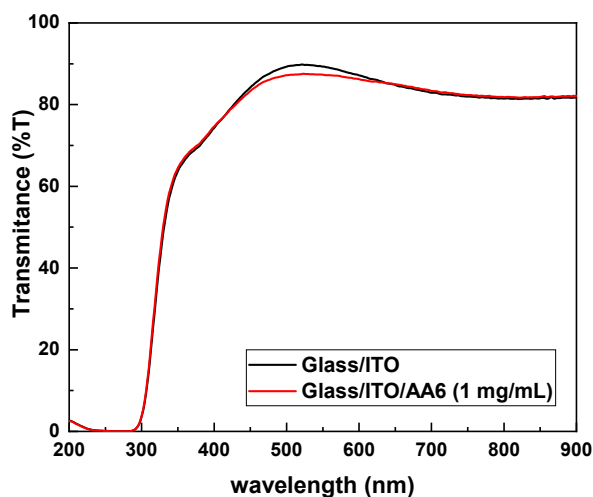

**Fig. S10** UV-Vis. %T spectra of AA6 coated on ITO/Glass substrate.

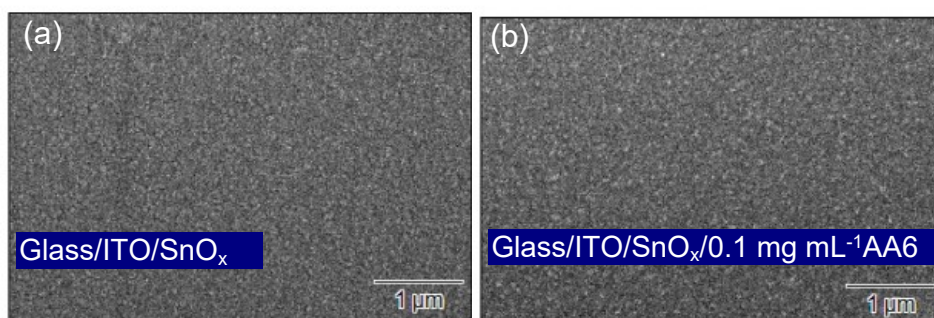

**Fig. S11** (a) SEM analysis of SnO<sub>x</sub>. (b) AA6 passivated SnO<sub>x</sub> thin films.

**Table S1** EDX percentage of all possible elements in SnO<sub>x</sub> and AA6 passivated SnO<sub>x</sub> thin films.

| Element      | SnO <sub>x</sub> | SnO <sub>x</sub> /0.05 mg mL <sup>-1</sup> | SnO <sub>x</sub> / 0.1 mg mL <sup>-1</sup> | SnO <sub>x</sub> /0.2 mg mL <sup>-1</sup> |
|--------------|------------------|--------------------------------------------|--------------------------------------------|-------------------------------------------|
|              | wt. %            | AA6<br>wt. %                               | AA6<br>wt. %                               | AA6<br>wt. %                              |
| <b>C</b>     | 6.89             | 6.47                                       | 6.94                                       | 6.15                                      |
| <b>N</b>     | 3.29             | 2.54                                       | 0.61                                       | 2.14                                      |
| <b>O</b>     | 50.24            | 49.47                                      | 51.69                                      | 51.65                                     |
| <b>S</b>     | <b>0.02</b>      | <b>0.09</b>                                | <b>0.3</b>                                 | <b>0.41</b>                               |
| <b>Sn</b>    | 39.56            | 41.45                                      | 40.45                                      | 39.65                                     |
| <b>Total</b> | 100.00           | 100.00                                     | 100.00                                     | 100.00                                    |

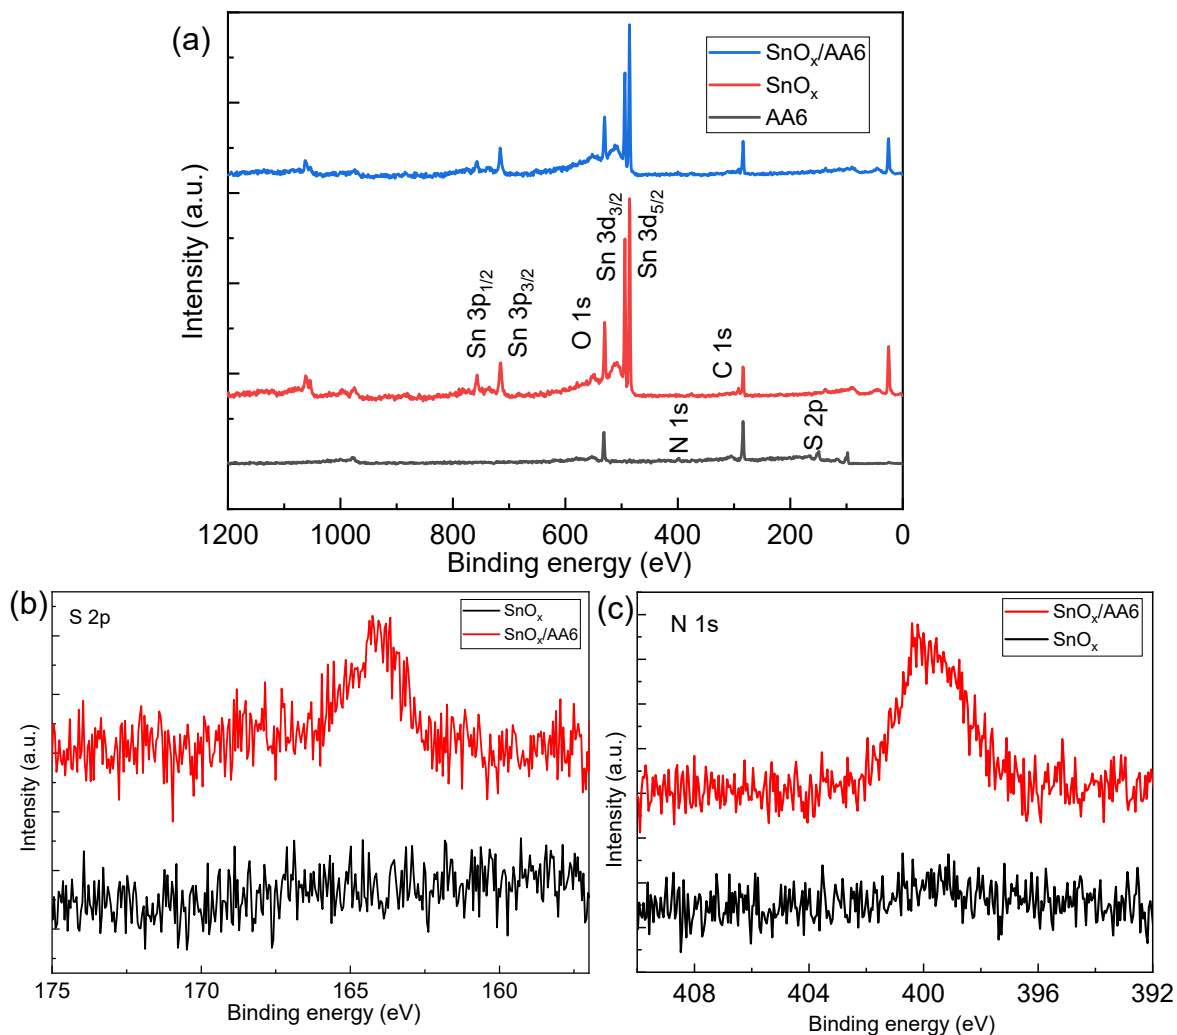

**Fig. S12** (a) XPS survey scan of AA6, SnO<sub>x</sub> & SnO<sub>x</sub>/AA6 thin films. (b) S 2p plots for SnO<sub>x</sub> and AA6 passivated SnO<sub>x</sub> films. (c) corresponding N1s plot.

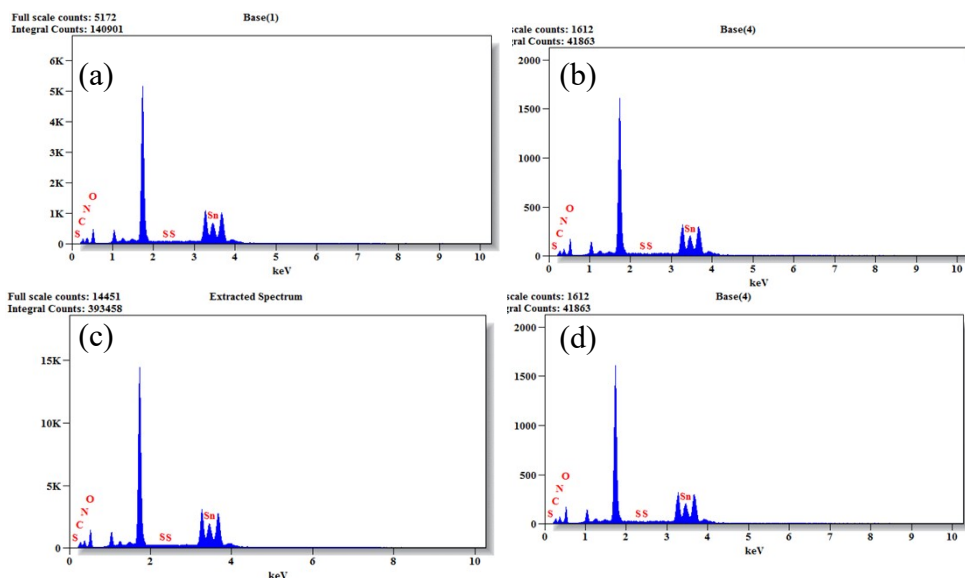

**Fig. S13** EDX plot for SnO<sub>x</sub> and AA6 passivated SnO<sub>x</sub> films as follows. (a) SnO<sub>x</sub>. (b) SnO<sub>x</sub>/0.05 mg mL<sup>-1</sup> AA6. (c) SnO<sub>x</sub>/0.1 mg mL<sup>-1</sup> AA6. (d) SnO<sub>x</sub>/0.2 mg mL<sup>-1</sup> AA6.

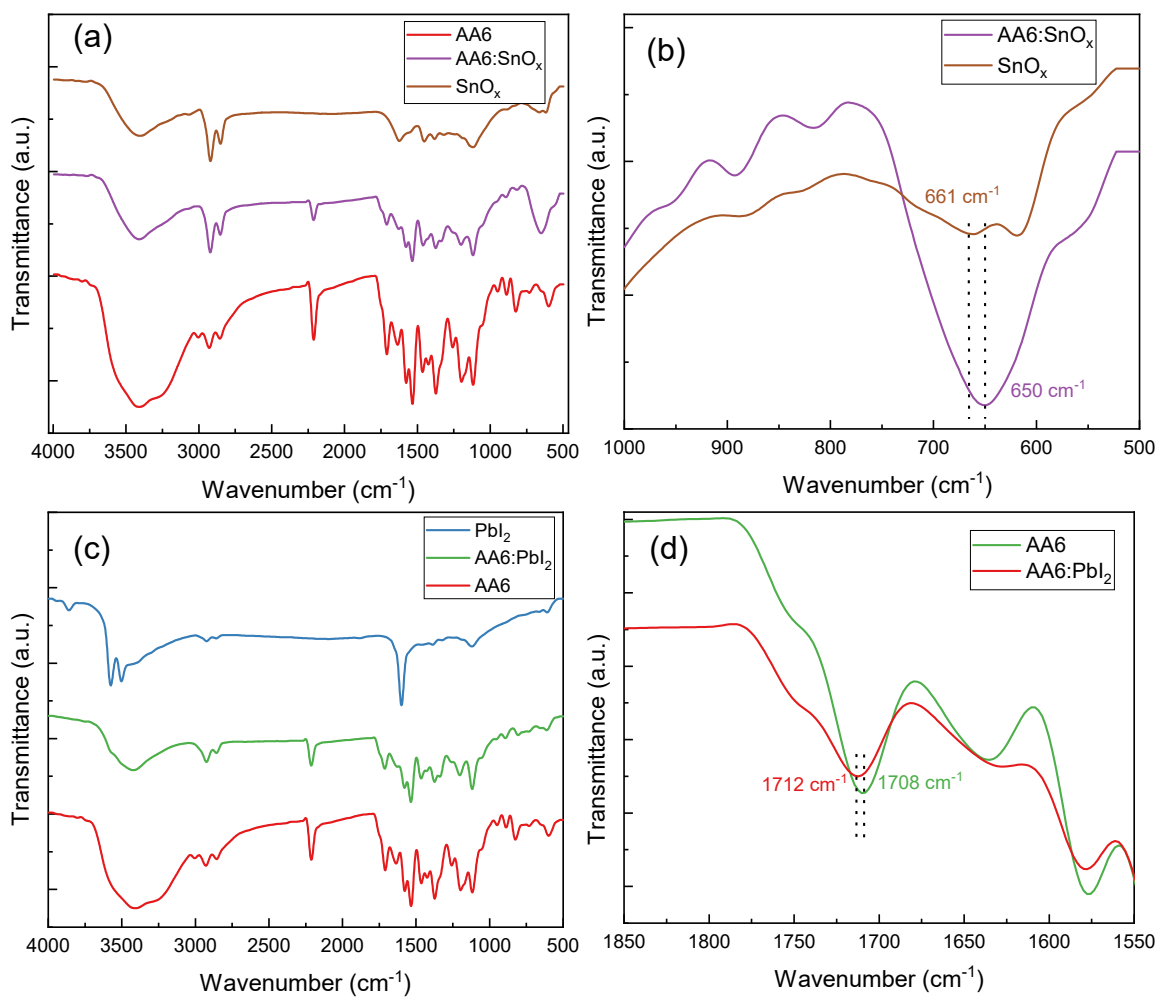

**Fig. S14** FTIR spectra of (a) SnO<sub>x</sub>, AA6 and SnO<sub>x</sub>:AA6 mixed samples. (b) Zoomed view of Sn–O vibration peak. (c) FTIR spectra of PbI<sub>2</sub>, AA6 and AA6:PbI<sub>2</sub> mixed samples. (d) Zoomed view of -C=O stretching vibration peak.

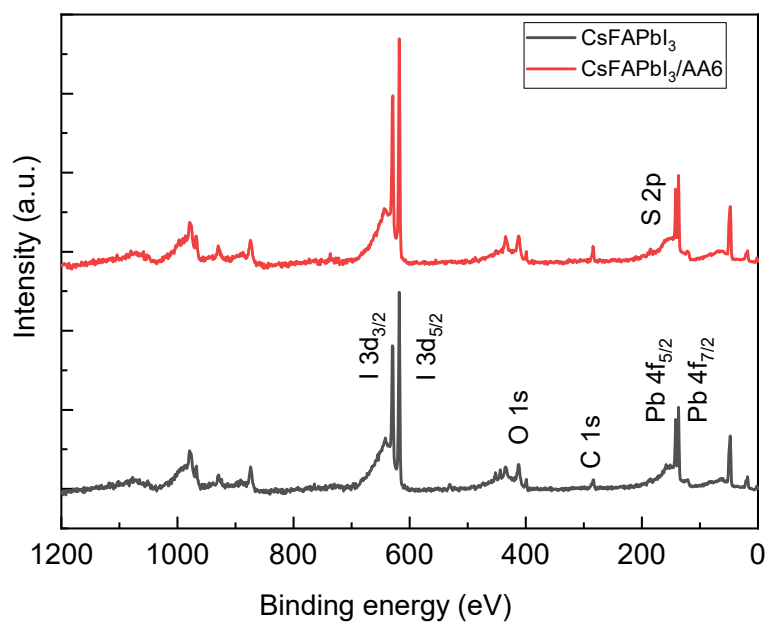

**Fig. S15** XPS survey scan of CsFAPbI<sub>3</sub> and CsFAPbI<sub>3</sub>/AA6 thin films.

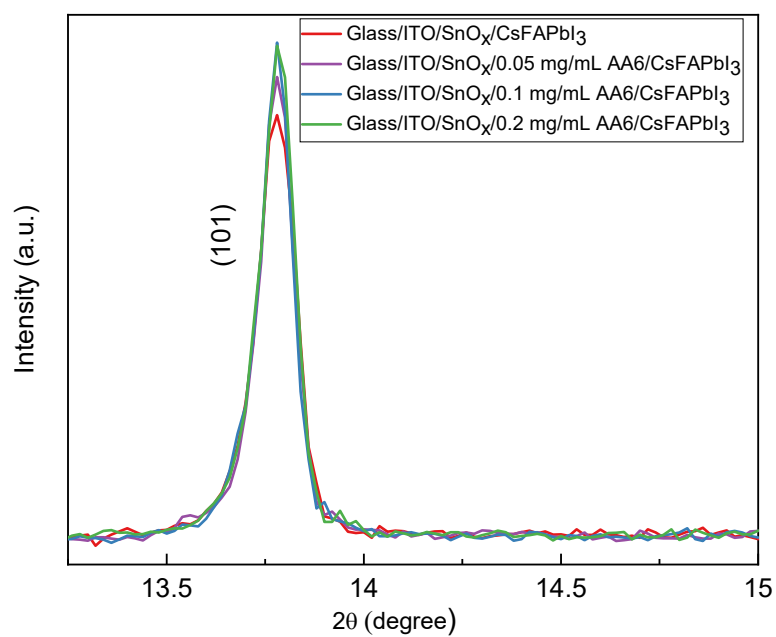

**Fig. S16** XRD spectra of CsFAPbI<sub>3</sub> (101) plane intensity comparison.

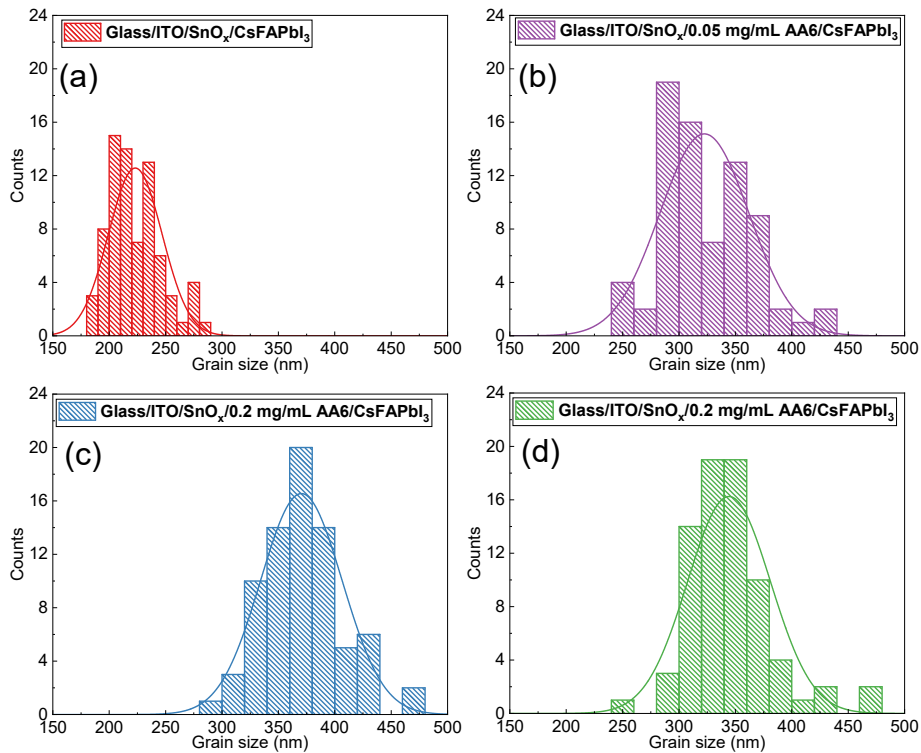

**Fig. S17** (a) SEM grain size histogram plots of CsFAPb<sub>3</sub> and (b–d) AA6 passivated CsFAPb<sub>3</sub> films, grain size was calculated from ImageJ software with an average of randomly measured 75 grains.

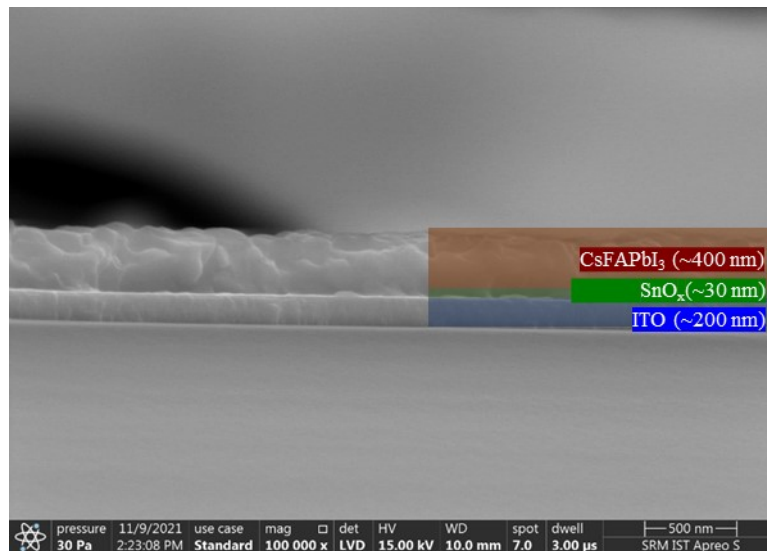

**Fig. S18** Cross-section SEM of Glass/ITO/SnO<sub>x</sub>/CsFAPb<sub>3</sub>.

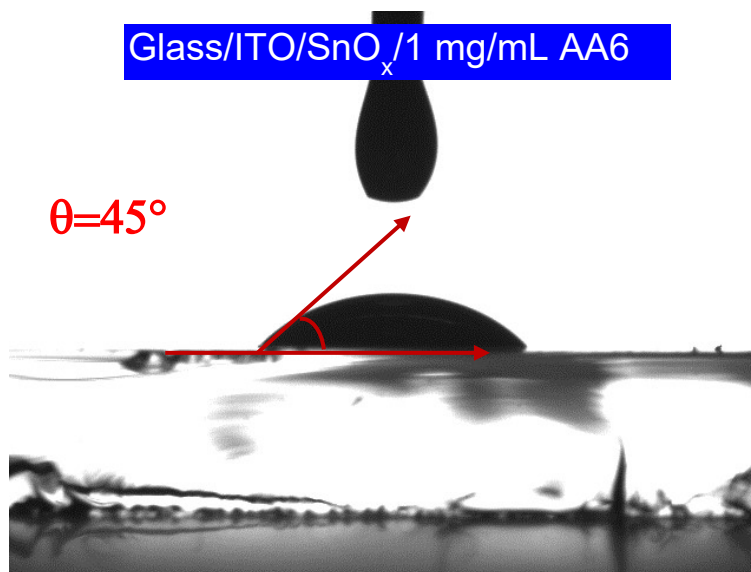

**Fig. S19** Perovskite ink-based contact angle measurements for glass/ITO/SnO<sub>x</sub>/1 mg mL<sup>-1</sup> AA6.

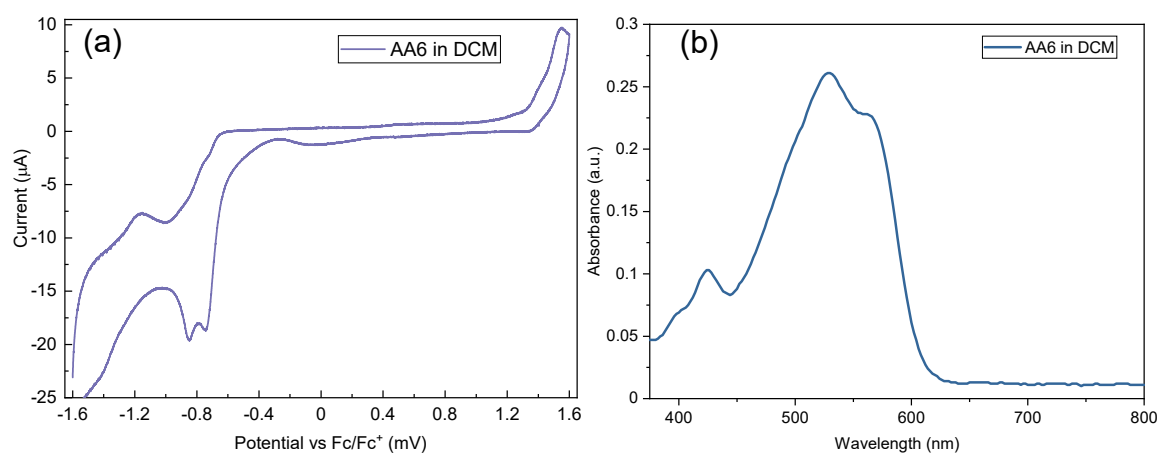

**Fig. S20** (a) CV analysis of AA6 molecule (in DCM). (b) UV-Vis. spectra of AA6 molecule (in DCM).

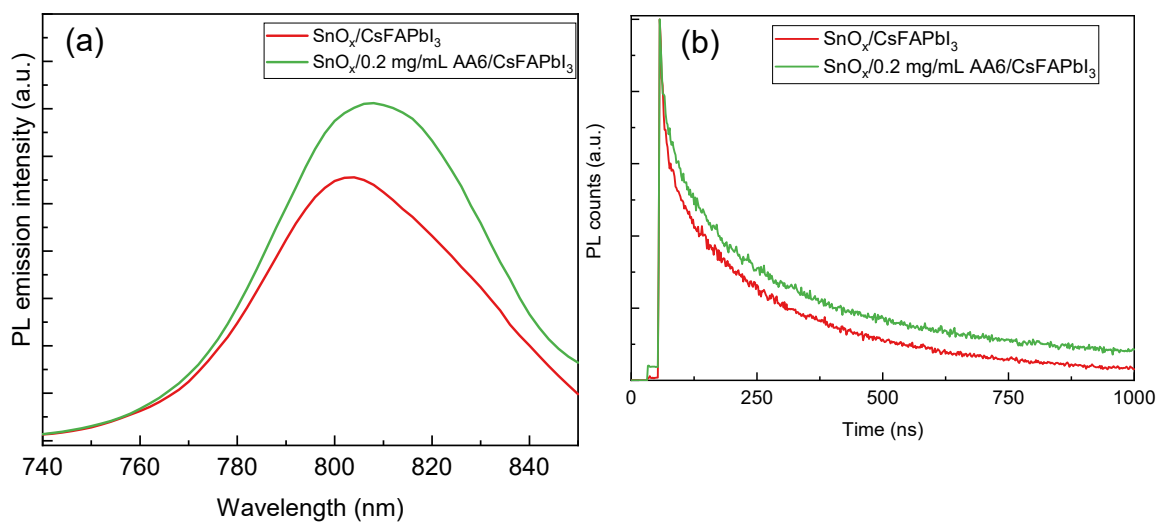

**Fig. S21** (a) Steady state PL analysis of  $\text{CsFAPbI}_3$  coated on  $\text{SnO}_x$  and  $0.2 \text{ mg mL}^{-1}$  AA6 passivated  $\text{SnO}_x$  films. (b) corresponding lifetime analysis.

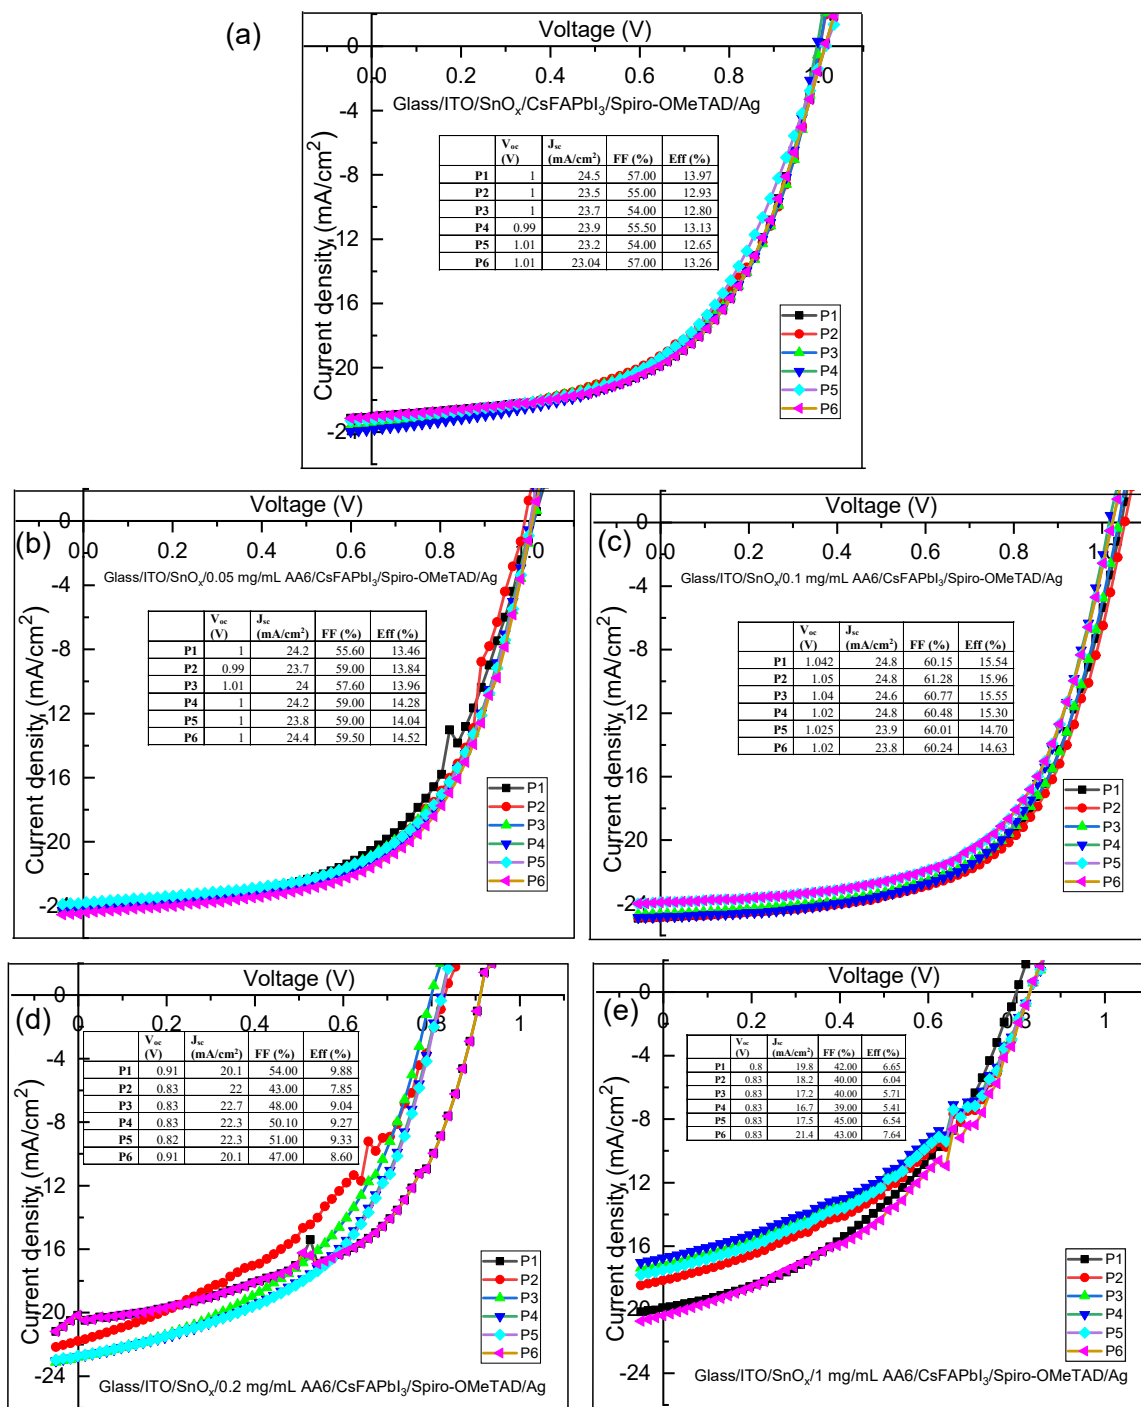

**Fig. S22** Representative J-V plots of AA6 passivated PSC. (a) bare SnO<sub>x</sub>. (b) SnO<sub>x</sub>/0.05 mg mL<sup>-1</sup> AA6. (c) SnO<sub>x</sub>/0.1 mg mL<sup>-1</sup> AA6. (d) SnO<sub>x</sub>/0.2 mg mL<sup>-1</sup> AA6 and (e) SnO<sub>x</sub>/1 mg mL<sup>-1</sup> AA6.



**Table S2** Sn 3d<sub>5/2</sub> peak fitting parameters of SnO<sub>x</sub> & SnO<sub>x</sub>/AA6.

|                             | SnO <sub>x</sub> | SnO <sub>x</sub> /AA6 |
|-----------------------------|------------------|-----------------------|
| Sn <sup>4+</sup> peak [eV]  | 486.6            | 486.5                 |
| Sn <sup>2+</sup> peak [eV]  | 487.1            | 487                   |
| Sn <sup>0</sup> peak [eV]   | 485.8            | 485.4                 |
| Sn <sup>4+</sup> peak area  | 49819            | 36077                 |
| Sn <sup>2+</sup> peak area  | 13706            | 7256                  |
| Sn <sup>0</sup> peak area   | 5333             | 1899                  |
| Sn <sup>4+</sup> FWHM       | 1.18             | 1.22                  |
| Sn <sup>2+</sup> FWHM       | 1.74             | 1.81                  |
| Sn <sup>0</sup> FWHM        | 2                | 1.56                  |
| Sn <sup>4+</sup> percentage | 72               | 80                    |
| Sn <sup>2+</sup> percentage | 20               | 16                    |
| Sn <sup>0</sup> percentage  | 8                | 4                     |

**Table S3** O 1s peak fitting parameters of SnO<sub>x</sub> & SnO<sub>x</sub>/AA6.

|                             | SnO <sub>x</sub> | SnO <sub>x</sub> /AA6 |
|-----------------------------|------------------|-----------------------|
| Lattice oxygen peak [eV]    | 530.7            | 530.7                 |
| Amorphous oxygen peak [eV]  | 532.1            | 532.1                 |
| Sn-O-S or Sn-O-N peak [eV]  | -                | 532                   |
| Lattice oxygen peak area    | 13153            | 9202                  |
| Amorphous oxygen peak area  | 6735             | 3639                  |
| Sn-O-S or Sn-O-N peak area  | -                | 913                   |
| Lattice oxygen FWHM         | 1.45             | 1.44                  |
| Amorphous oxygen FWHM       | 1.54             | 1.9                   |
| Sn-O-S or Sn-O-N FWHM       | -                | 0.98                  |
| Lattice oxygen percentage   | 66               | 67                    |
| Amorphous oxygen percentage | 33               | 26                    |
| Sn-O-S or Sn-O-N percentage | -                | 7                     |

**Table S4** TRPL lifetime parameters of CsFAPbI<sub>3</sub> on SnO<sub>x</sub> and AA6 passivated SnO<sub>x</sub>.

| Samples                                                                          | $\tau_1$ | I <sub>1</sub> | $\tau_2$ | I <sub>2</sub> | $\tau_{avg}$ |
|----------------------------------------------------------------------------------|----------|----------------|----------|----------------|--------------|
|                                                                                  | (ns)     | (%)            | (ns)     | (%)            | (ns)         |
| Glass/ITO/SnO <sub>x</sub> /CsFAPbI <sub>3</sub>                                 | 65       | 8              | 305      | 92             | 301          |
| Glass/ITO/SnO <sub>x</sub> /0.05 mg mL <sup>-1</sup><br>AA6/CsFAPbI <sub>3</sub> | 60       | 9              | 260      | 91             | 256          |
| Glass/ITO/SnO <sub>x</sub> /0.1 mg mL <sup>-1</sup><br>AA6/CsFAPbI <sub>3</sub>  | 25       | 6              | 180      | 94             | 179          |
| Glass/ITO/SnO <sub>x</sub> /0.2 mg mL <sup>-1</sup><br>AA6/CsFAPbI <sub>3</sub>  | 56       | 6              | 310      | 94             | 304          |

\* Where  $\tau_1$  and  $\tau_2$  indicate fast decay and slow decay lifetime component of perovskite absorber, I<sub>1</sub> and I<sub>2</sub> refer to corresponding amplitude and  $\tau_{avg}$  represents average PL lifetime.
